# Supplementary material for: Doping-induced magnetism and magnetoelectric coupling in one-dimensional NbOCl3 and NbOBr3
Source: Royal Society of Chemistry journal article supplement (doi:10.1039/d2cp05823e), 2023-01-01
Supplement: d2cp05823e1.pdf [file d2cp05823e1.pdf]

## Supplementary Information for “Doping-induced magnetism and magnetoelectric coupling in one-dimensional NbOCl<sub>3</sub> and NbOBr<sub>3</sub>”

Ruiman He, Pengyu Liu, Bing Wang, Jinbo Fan\*, and Chang Liu\*

*Institute for Computational Materials Science, Joint Center for Theoretical Physics (JCTP),  
School of Physics and Electronics, Henan University, Kaifeng, 475004, China*

Corresponding author: [jinbofan1988@126.com](mailto:jinbofan1988@126.com); [cliu@vip.henu.edu.cn](mailto:cliu@vip.henu.edu.cn)

**Table S1.** Total magnetic moments of different elements in the top and bottom cell as well as their moment differences for n-L nanochain of NbOCl<sub>3</sub>, electing the doping concentration of  $2.9 \times 10^{14}/\text{cm}^2$  and  $\Delta\mu = \mu_{top} - \mu_{bot}$ .

|                  | 2-L    | 3-L    | 4-L    | 5-L    | 6-L    |
|------------------|--------|--------|--------|--------|--------|
| $Nb_{top}$       | 0.696  | 0.806  | 0.95   | 1.006  | 1.036  |
| $Nb_{bot}$       | 0.242  | 0.294  | 0.304  | 0.344  | 0.354  |
| $\Delta\mu_{Nb}$ | 0.454  | 0.512  | 0.646  | 0.662  | 0.682  |
| $Cl_{top}$       | 0.074  | 0.072  | 0.09   | 0.09   | 0.09   |
| $Cl_{bot}$       | 0.008  | 0.014  | 0.004  | 0.006  | 0.006  |
| $\Delta\mu_{Cl}$ | 0.066  | 0.058  | 0.086  | 0.084  | 0.084  |
| $O_{top}$        | -0.032 | -0.04  | -0.044 | -0.048 | -0.05  |
| $O_{bot}$        | -0.016 | -0.018 | -0.022 | -0.024 | -0.024 |
| $\Delta\mu_O$    | -0.016 | -0.022 | -0.022 | -0.024 | -0.026 |

**Table S2.** Total magnetic moments of different elements in the top and bottom cell as well as their moment differences for n-L nanochain of NbOBr<sub>3</sub>, electing the doping concentration of  $2.9 \times 10^{14}/\text{cm}^2$  and  $\Delta\mu = \mu_{top} - \mu_{bot}$ .

|                  | 2-L    | 3-L    | 4-L    | 5-L    | 6-L    |
|------------------|--------|--------|--------|--------|--------|
| $Nb_{top}$       | 0.76   | 0.794  | 1.068  | 1.04   | 1.11   |
| $Nb_{bot}$       | 0.264  | 0.29   | 0.232  | 0.288  | 0.326  |
| $\Delta\mu_{Nb}$ | 0.496  | 0.504  | 0.836  | 0.752  | 0.784  |
| $Br_{top}$       | 0.034  | 0.024  | 0.098  | 0.098  | 0.099  |
| $Br_{bot}$       | 0.01   | 0.014  | -0.008 | 0      | 0.002  |
| $\Delta\mu_{Br}$ | 0.024  | 0.01   | 0.106  | 0.098  | 0.097  |
| $O_{top}$        | -0.048 | -0.054 | -0.052 | -0.052 | -0.056 |
| $O_{bot}$        | -0.016 | -0.016 | -0.02  | -0.02  | -0.024 |
| $\Delta\mu_O$    | -0.032 | -0.038 | -0.032 | -0.032 | -0.032 |

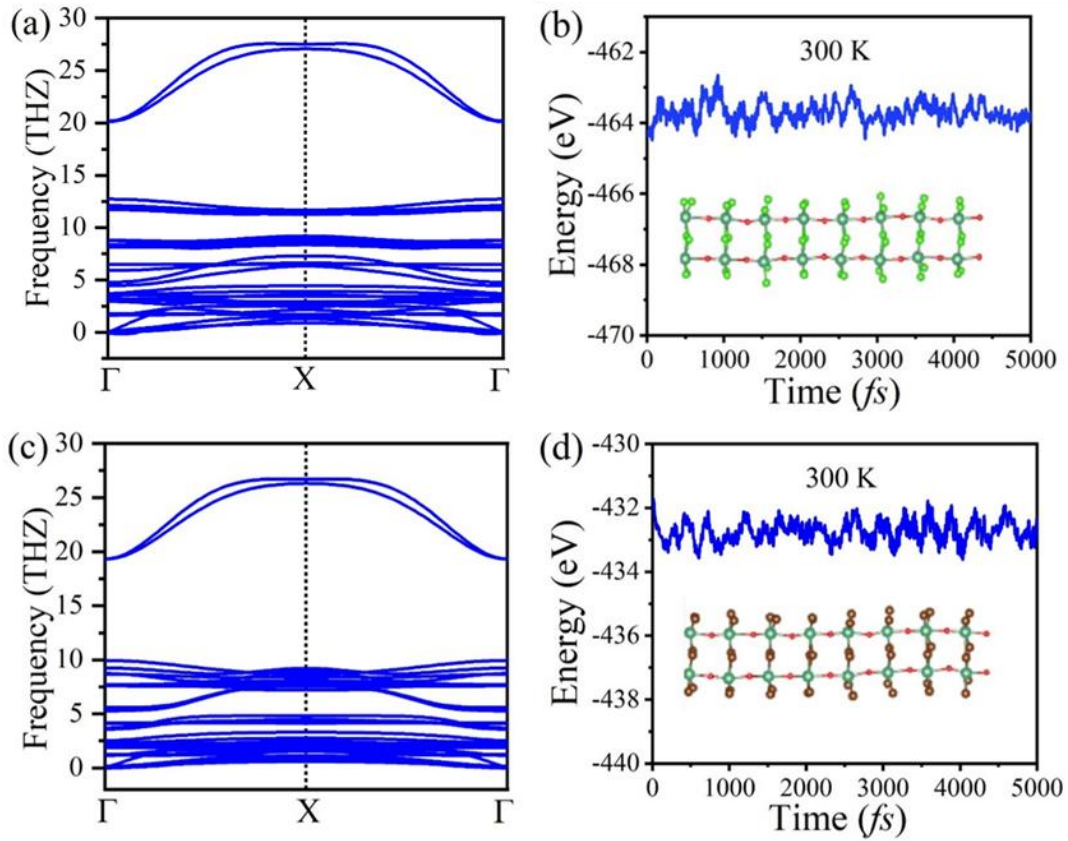

**Figure S1.** The phonon spectra of (a) 1D NbOCl<sub>3</sub> and (c) 1D NbOBr<sub>3</sub>. The evolutions of the total energy of (b) 1D NbOCl<sub>3</sub> and (d) 1D NbOBr<sub>3</sub> with time at 300K through the AIMD simulations, and illustrations are the final atomic structures.

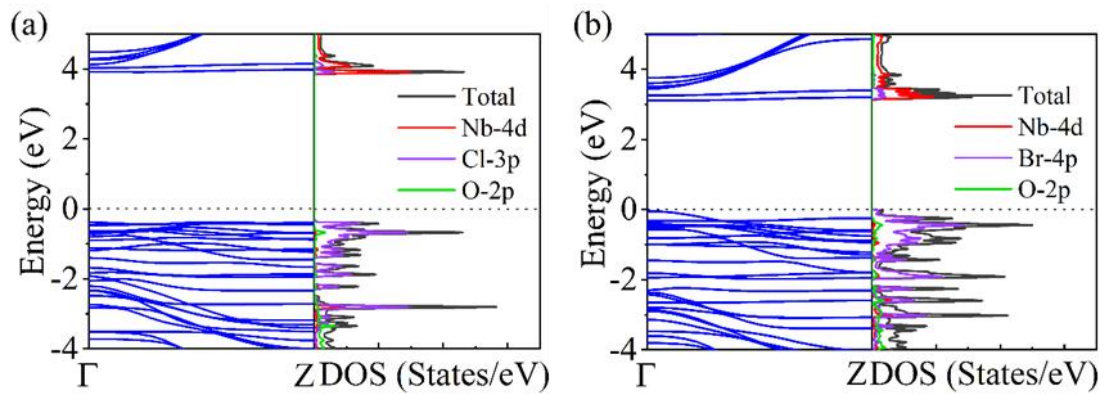

**Figure S2.** The band structures and projected densities of orbital states of (a) 1D NbOCl<sub>3</sub> and (b) 1D NbOBr<sub>3</sub> calculated by HSE method.

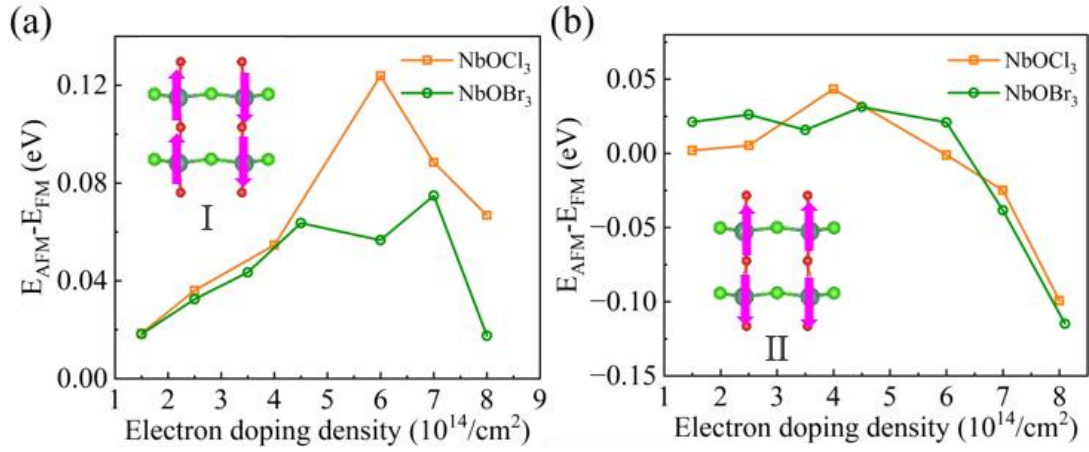

**Figure S3.** (a) and (b) are the energy difference of FM and two types of AFM ( $\Delta E = E_{\text{AFM}} - E_{\text{FM}}$ ) as a function of the electron-doping concentration in 1D NbOX<sub>3</sub> (X=Cl, Br), the illustrations are the corresponding schematic diagrams of two types of antiferromagnetic orders.

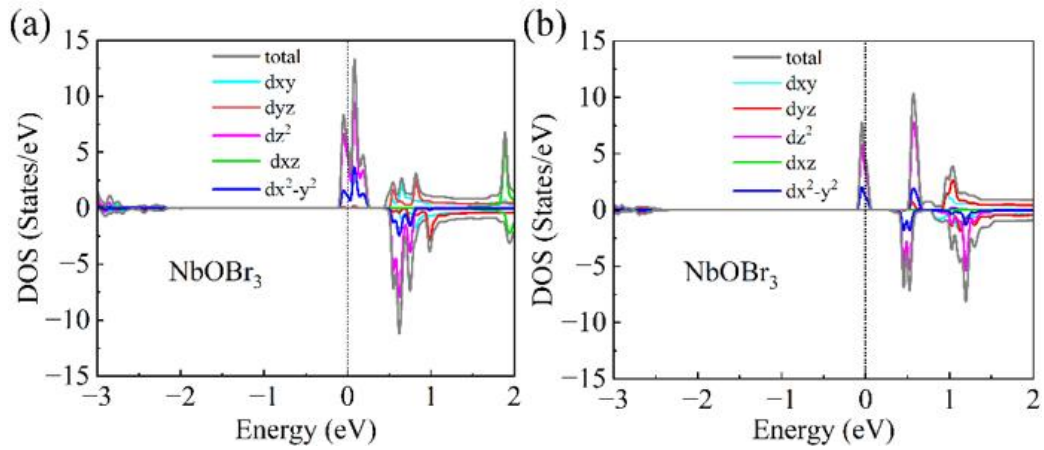

**Figure S4.** The PDOS of Nb-d orbital for (a) 1D NbOCl<sub>3</sub> at the concentration of  $4.0 \times 10^{14}/\text{cm}^2$  and (b) 1D NbOBr<sub>3</sub> at the concentration of  $3.9 \times 10^{14}/\text{cm}^2$ .

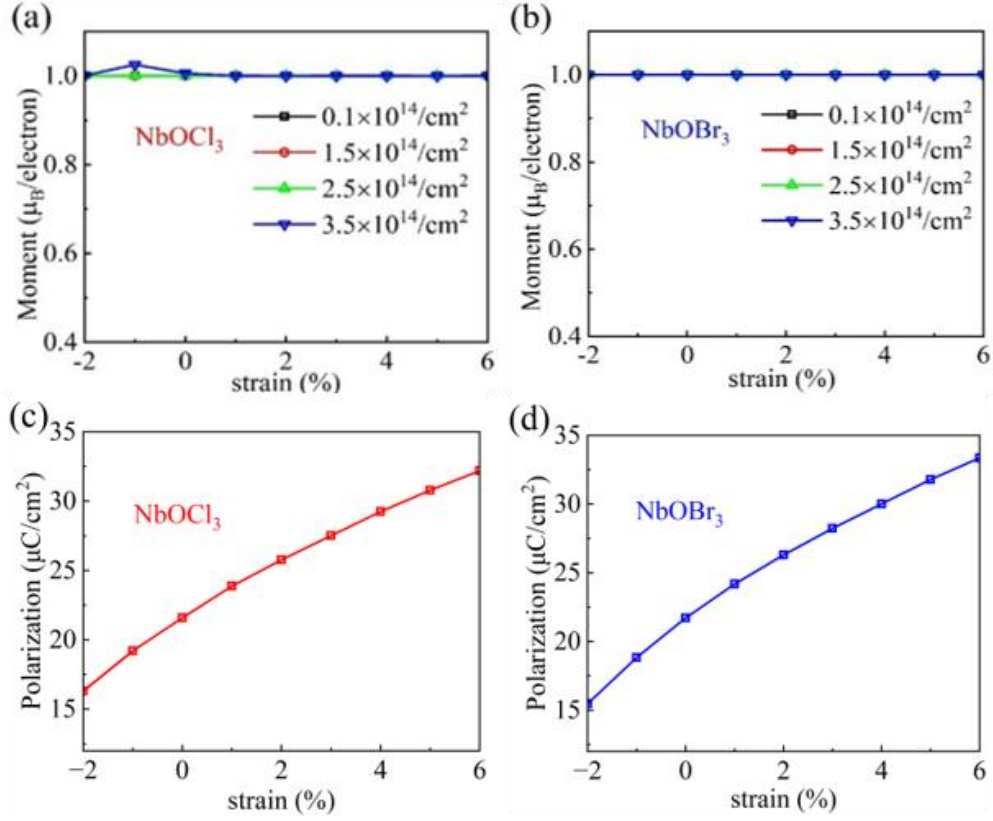

**Figure S5.** The doping-induced magnetic moment vs strain in (a) 1D  $\text{NbOCl}_3$  and (b) 1D  $\text{NbOBr}_3$  at different doping-electrons concentrations. The ferroelectric polarization under different strains without doping in (c) 1D  $\text{NbOCl}_3$  and (d) 1D  $\text{NbOBr}_3$ .

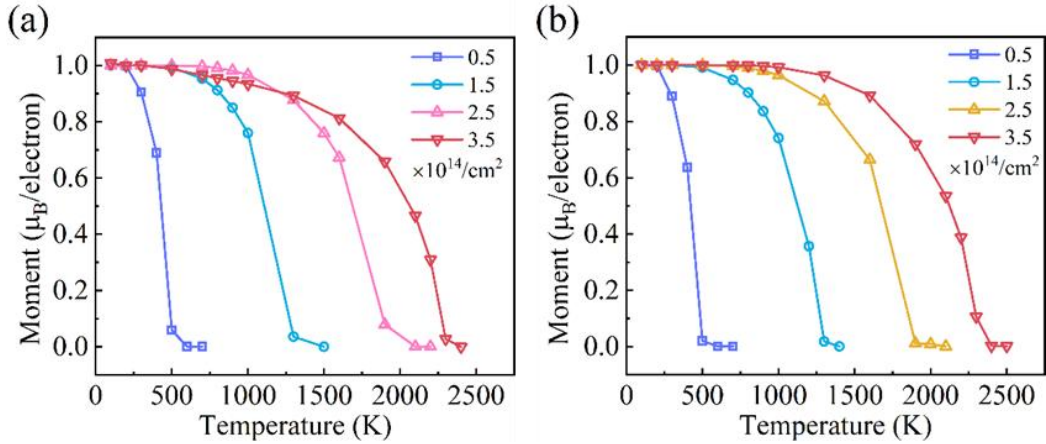

**Figure S6.** The spin magnetic moment vs temperature for (a) 1D  $\text{NbOCl}_3$  and (b) 1D  $\text{NbOBr}_3$  at different doping concentrations. In this simulation, the magnetic carriers are approximated to satisfy the Fermi-Dirac distribution function  $f\left(\frac{\varepsilon-\mu}{\sigma}\right) = \frac{1}{\exp\left(\frac{\varepsilon-\mu}{\sigma}+1\right)}$ , where  $\mu$  is the chemical potential, and  $\sigma = \kappa_B T$  is the energy broadening factor that introduces temperature effect.

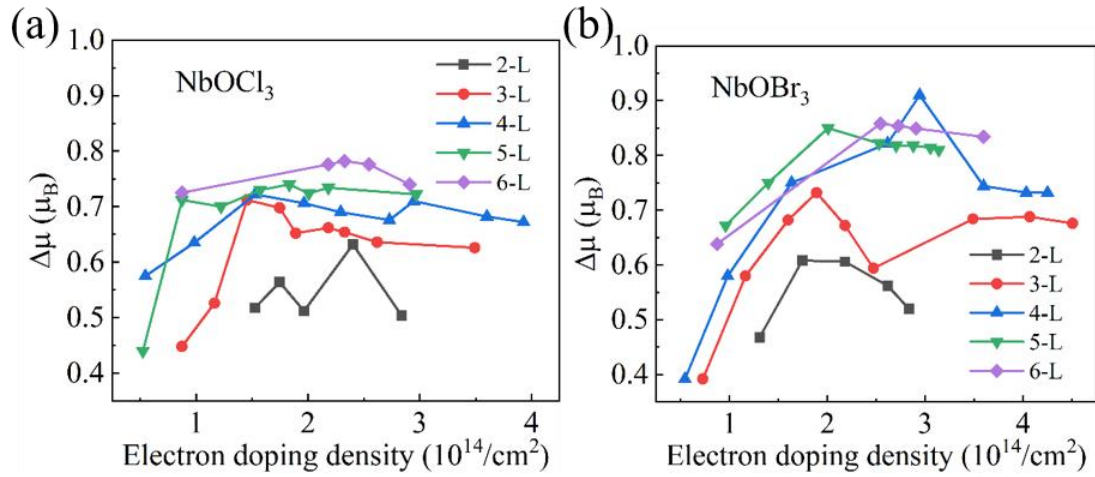

**Figure S7.** The magnetic moment difference ( $\Delta\mu = \mu_{top} - \mu_{bot}$ ) of (a) n-L NbOCl<sub>3</sub> and (b) n-L NbOBr<sub>3</sub> nanochains under different doping concentrations.

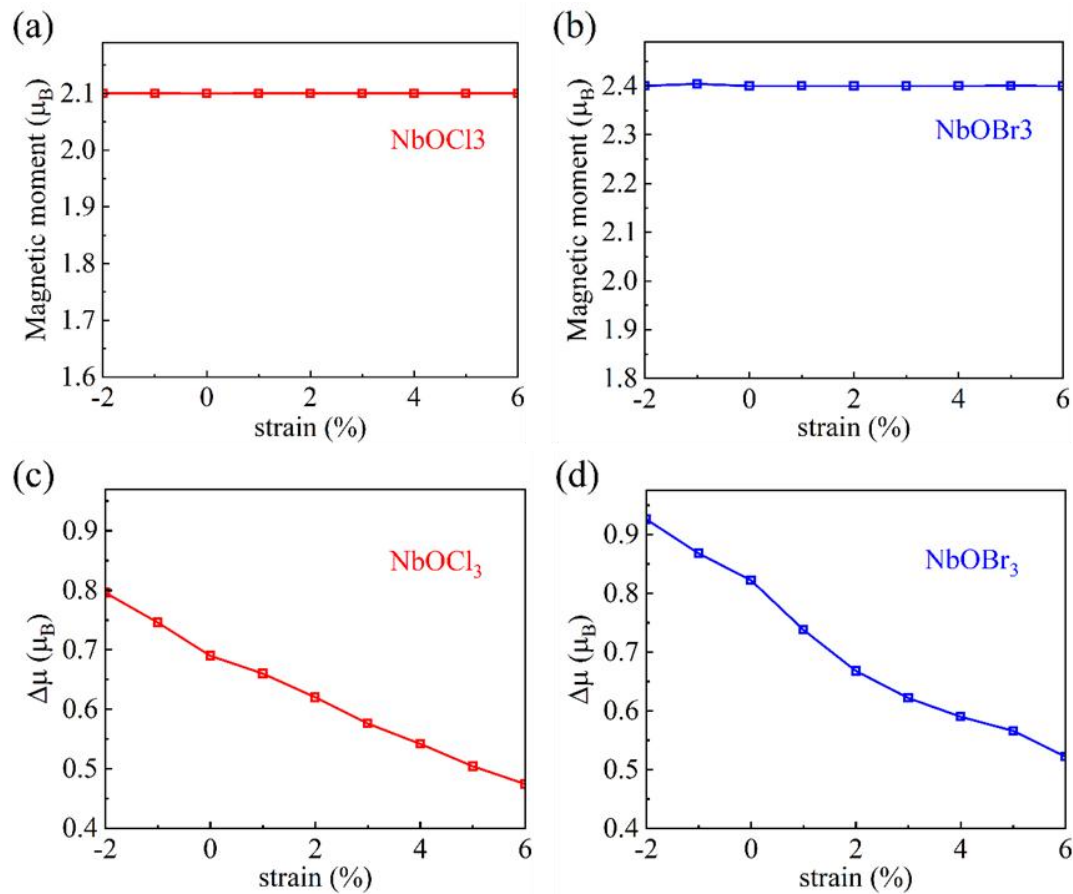

**Figure S8.** Under different strains, (a) the total magnetic moments and (b) magnetic moment differences of 4-L NbOCl<sub>3</sub> at the concentration of  $2.29 \times 10^{14}/\text{cm}^2$  (doping about 2.1 electrons), (a) the total magnetic moments and (b) magnetic moment differences of 4-L NbOBr<sub>3</sub> at the concentration of  $2.62 \times 10^{14}/\text{cm}^2$  (doping about 2.4 electrons).
